# Supplementary material for: Antibiotics and probiotics-induced effects on the total fatty acid composition of feces in a rat model
Source: PubMed Central journal article supplement (PMC10951306; doi:10.1038/s41598-024-57046-6), 2024-03-19
Supplement: 41598_2024_57046_MOESM3_ESM.pdf [file 41598_2024_57046_MOESM3_ESM.pdf]

# Supplementary files

## Antibiotics and probiotics-induced effects on the total fatty acid composition of feces in a rat model

Tamás Marosvölgyi<sup>1,+</sup>, Kitti Mintál<sup>2,3,+</sup>, Nelli Farkas<sup>1</sup>, Zoltán Sipos<sup>1</sup>, Lilla Makszin<sup>1</sup>, Éva Szabó<sup>4,\*</sup>, Attila Tóth<sup>2,3</sup>, Béla Kocsis<sup>5</sup>, Krisztina Kovács<sup>5</sup>, Edina Hormay<sup>2,3</sup>, László Lénárd<sup>2,3</sup>, Zoltán Karádi<sup>2,3</sup>, Anita Bufa<sup>1</sup>

<sup>1</sup>Institute of Bioanalysis, Medical School, University of Pécs, Pécs, 7624, Hungary

<sup>2</sup>Institute of Physiology, Medical School, University of Pécs, Pécs, 7624, Hungary

<sup>3</sup>Medical and Engineering Multidisciplinary Cellular Bioimpedance Research Group, Szentágothai Research Centre, University of Pécs, Pécs, 7624, Hungary

<sup>4</sup>Department of Biochemistry and Medical Chemistry, Medical School, University of Pécs, Pécs, 7624, Hungary

<sup>5</sup>Department of Medical Microbiology and Immunology, Medical School, University of Pécs, Pécs, 7624, Hungary

\*szabo.eva.dr@pte.hu

**Supplementary Table S1:** Results of the mixed effect models of the determined fatty acids for both concentration and weight percent values.

| Fatty acid            | The nested linear mixed effect model |                         |                         |                        |                         |                         |
|-----------------------|--------------------------------------|-------------------------|-------------------------|------------------------|-------------------------|-------------------------|
|                       | p value for concentrations           |                         |                         | p value for weight%    |                         |                         |
|                       | time point                           | treatment               | time point x treatment  | time point             | treatment               | time point x treatment  |
| <b>C4:0</b>           | $4.17 \times 10^{-13}$               | $3.70 \times 10^{-9}$   | $2.15 \times 10^{-10}$  | $4.11 \times 10^{-7}$  | $3.18 \times 10^{-7}$   | $1.15 \times 10^{-3}$   |
| <b>C5:0</b>           | $1.41 \times 10^{-6}$                | $1.83 \times 10^{-13}$  | $4.96 \times 10^{-5}$   | $1.35 \times 10^{-2}$  | $1.54 \times 10^{-2}$   | 0.111                   |
| <b>C6:0</b>           | $9.52 \times 10^{-3}$                | $2.32 \times 10^{-9}$   | 0.201                   | 0.0639                 | $1.53 \times 10^{-4}$   | 0.389                   |
| <b>C7:0</b>           | 0.474                                | $1.51 \times 10^{-3}$   | $4.12 \times 10^{-2}$   | 0.953                  | 0.272                   | 0.130                   |
| <b>C8:0</b>           | $1.43 \times 10^{-2}$                | $2.76 \times 10^{-4}$   | 0.733                   | 0.0559                 | $1.90 \times 10^{-3}$   | 0.858                   |
| <b>C9:0</b>           | 0.498                                | 0.145                   | 0.275                   | 0.327                  | 0.0966                  | 0.271                   |
| <b>C10:0</b>          | $2.15 \times 10^{-2}$                | $5.04 \times 10^{-12}$  | 0.0532                  | $3.68 \times 10^{-2}$  | $2.54 \times 10^{-10}$  | 0.0575                  |
| <b>C11:0</b>          | 0.433                                | $3.35 \times 10^{-10}$  | 0.619                   | 0.286                  | $1.44 \times 10^{-10}$  | 0.316                   |
| <b>C12:0</b>          | $1.45 \times 10^{-6}$                | $1.09 \times 10^{-7}$   | $8.91 \times 10^{-4}$   | 0.695                  | $1.42 \times 10^{-2}$   | 0.998                   |
| <b>C13ai</b>          | $2.92 \times 10^{-6}$                | $< 2.2 \times 10^{-16}$ | $2.77 \times 10^{-7}$   | $1.31 \times 10^{-6}$  | $2.39 \times 10^{-13}$  | $7.03 \times 10^{-8}$   |
| <b>C14i</b>           | $3.16 \times 10^{-16}$               | $< 2.2 \times 10^{-16}$ | $< 2.2 \times 10^{-16}$ | $4.71 \times 10^{-15}$ | $< 2.2 \times 10^{-16}$ | $< 2.2 \times 10^{-16}$ |
| <b>C13:1n-1</b>       | $6.97 \times 10^{-14}$               | $< 2.2 \times 10^{-16}$ | $< 2.2 \times 10^{-16}$ | $9.67 \times 10^{-11}$ | $< 2.2 \times 10^{-16}$ | $< 2.2 \times 10^{-16}$ |
| <b>C14:0</b>          | $6.92 \times 10^{-11}$               | $3.52 \times 10^{-11}$  | $8.24 \times 10^{-12}$  | $9.44 \times 10^{-6}$  | $3.39 \times 10^{-8}$   | $3.55 \times 10^{-6}$   |
| <b>C15i</b>           | $4.82 \times 10^{-15}$               | $< 2.2 \times 10^{-16}$ | $< 2.2 \times 10^{-16}$ | $6.10 \times 10^{-12}$ | $< 2.2 \times 10^{-16}$ | $< 2.2 \times 10^{-16}$ |
| <b>C15ai</b>          | $8.94 \times 10^{-11}$               | $< 2.2 \times 10^{-16}$ | $< 2.2 \times 10^{-16}$ | $3.31 \times 10^{-7}$  | $< 2.2 \times 10^{-16}$ | $1.07 \times 10^{-14}$  |
| <b>C14:1n-5</b>       | $1.67 \times 10^{-5}$                | 0.62                    | $2.29 \times 10^{-5}$   | $1.16 \times 10^{-4}$  | 0.853                   | $1.03 \times 10^{-4}$   |
| <b>C15:0</b>          | $1.73 \times 10^{-11}$               | $< 2.2 \times 10^{-16}$ | $1.93 \times 10^{-15}$  | $9.45 \times 10^{-10}$ | $< 2.2 \times 10^{-16}$ | $< 2.2 \times 10^{-16}$ |
| <b>C16i</b>           | $5.34 \times 10^{-6}$                | $2.93 \times 10^{-15}$  | $4.22 \times 10^{-10}$  | $4.49 \times 10^{-2}$  | $4.22 \times 10^{-8}$   | $9.59 \times 10^{-5}$   |
| <b>C16:0</b>          | $2.59 \times 10^{-3}$                | $3.31 \times 10^{-7}$   | $6.62 \times 10^{-5}$   | 0.505                  | 0.898                   | 0.154                   |
| <b>tC16:1n-7+C17i</b> | $3.13 \times 10^{-4}$                | $2.26 \times 10^{-9}$   | $4.51 \times 10^{-7}$   | 0.135                  | $7.06 \times 10^{-6}$   | $3.11 \times 10^{-2}$   |
| <b>C16:1n-9</b>       | 0.129                                | $4.91 \times 10^{-7}$   | $3.96 \times 10^{-2}$   | 0.690                  | $3.57 \times 10^{-2}$   | 0.650                   |

|                |                       |                         |                        |                       |                        |                        |
|----------------|-----------------------|-------------------------|------------------------|-----------------------|------------------------|------------------------|
| C16:1n-7       | $3.25 \times 10^{-4}$ | $7.49 \times 10^{-6}$   | $1.40 \times 10^{-2}$  | 0.247                 | 0.0956                 | 0.843                  |
| C17:0          | $1.01 \times 10^{-4}$ | $6.77 \times 10^{-14}$  | $2.77 \times 10^{-7}$  | 0.0969                | $3.16 \times 10^{-6}$  | $4.02 \times 10^{-3}$  |
| tC17:1n-7+C18i | $3.41 \times 10^{-4}$ | $8.79 \times 10^{-8}$   | $5.32 \times 10^{-7}$  | 0.785                 | 0.0695                 | $2.07 \times 10^{-2}$  |
| C18:0          | $2.08 \times 10^{-4}$ | $2.52 \times 10^{-12}$  | $2.59 \times 10^{-7}$  | 0.478                 | $9.08 \times 10^{-5}$  | $4.27 \times 10^{-4}$  |
| t18:1 mix      | $5.82 \times 10^{-7}$ | $< 2.2 \times 10^{-16}$ | $3.55 \times 10^{-14}$ | $2.53 \times 10^{-3}$ | $7.60 \times 10^{-13}$ | $8.06 \times 10^{-8}$  |
| C18:1n-9       | $1.96 \times 10^{-3}$ | $2.50 \times 10^{-6}$   | $5.33 \times 10^{-3}$  | $3.82 \times 10^{-3}$ | $3.11 \times 10^{-6}$  | $1.42 \times 10^{-3}$  |
| C18:1n-7       | $3.43 \times 10^{-5}$ | $2.11 \times 10^{-8}$   | $3.78 \times 10^{-4}$  | 0.102                 | $1.82 \times 10^{-3}$  | 0.544                  |
| C18:2n-6       | $2.41 \times 10^{-2}$ | 0.0524                  | 0.242                  | $5.23 \times 10^{-4}$ | $1.09 \times 10^{-14}$ | $3.00 \times 10^{-7}$  |
| C20:0          | $2.71 \times 10^{-4}$ | $1.10 \times 10^{-8}$   | $1.85 \times 10^{-6}$  | 0.450                 | 0.0524                 | $3.68 \times 10^{-4}$  |
| C20:1n-9       | $1.07 \times 10^{-4}$ | $1.63 \times 10^{-8}$   | $1.53 \times 10^{-5}$  | 0.861                 | 0.176                  | 0.101                  |
| C18:3n-3       | $5.00 \times 10^{-2}$ | $1.53 \times 10^{-2}$   | 0.217                  | $1.62 \times 10^{-4}$ | $2.14 \times 10^{-14}$ | $1.05 \times 10^{-5}$  |
| C20:2n-6       | $2.25 \times 10^{-6}$ | $8.52 \times 10^{-7}$   | $3.17 \times 10^{-6}$  | 0.987                 | 0.282                  | 0.797                  |
| C22:0          | $3.68 \times 10^{-3}$ | $1.56 \times 10^{-8}$   | $3.32 \times 10^{-4}$  | 0.155                 | 0.275                  | 0.881                  |
| C20:3n-6       | $3.35 \times 10^{-3}$ | $1.71 \times 10^{-4}$   | $8.77 \times 10^{-3}$  | 0.630                 | 0.290                  | 0.823                  |
| C22:1n-9       | $4.81 \times 10^{-3}$ | $1.36 \times 10^{-5}$   | 0.0962                 | 0.246                 | 0.647                  | 0.866                  |
| C23:0          | $2.19 \times 10^{-3}$ | $2.34 \times 10^{-4}$   | $1.03 \times 10^{-3}$  | 0.365                 | 0.363                  | 0.380                  |
| C20:4n-6       | 0.734                 | 0.0918                  | 0.316                  | $3.46 \times 10^{-7}$ | $9.08 \times 10^{-7}$  | $1.90 \times 10^{-10}$ |
| C24:0          | $1.21 \times 10^{-3}$ | $2.62 \times 10^{-8}$   | $7.40 \times 10^{-5}$  | 0.335                 | 0.104                  | 0.429                  |
| C20:5n-3       | 0.534                 | 0.284                   | 0.795                  | 0.916                 | 0.560                  | 0.915                  |
| C25:0          | 0.493                 | $4.16 \times 10^{-2}$   | 0.0545                 | 0.500                 | 0.578                  | 0.593                  |
| C22:4n-6       | 0.164                 | $3.93 \times 10^{-2}$   | 0.641                  | 0.657                 | 0.0666                 | 0.955                  |
| C22:5n-6       | $1.24 \times 10^{-2}$ | $2.17 \times 10^{-3}$   | 0.263                  | 0.734                 | 0.714                  | $3.10 \times 10^{-2}$  |
| C26:0          | $5.76 \times 10^{-3}$ | $2.58 \times 10^{-7}$   | $4.89 \times 10^{-4}$  | $1.19 \times 10^{-2}$ | $8.84 \times 10^{-3}$  | 0.354                  |

Significances are represented by bold characters ( $p < 0.05$ ).

**Supplementary Table S2:** Fatty acid concentration ( $\mu\text{g}$  fatty acid / 100 mg wet stool) values in the four treatment groups at each sampling time.

See SupplementaryTableS2.xlsx

**Supplementary Table S3:** Fatty acid weight percent (w/w%) values in the four treatment groups at each sampling time.

See SupplementaryTableS3.xlsx

**Supplementary Table S4:** Fatty acid composition of the LT/R standard rodent food pellet by Innovo Ltd.

| <b>w/w %</b>              | <b>Mean</b> | <b>SD</b> |
|---------------------------|-------------|-----------|
| <b>C14:0</b>              | 0.31        | 0.01      |
| <b>C16:0</b>              | 22.76       | 0.07      |
| <b>C18:0</b>              | 5.34        | 0.03      |
| <b>t18:1mix</b>           | 0.09        | 0.01      |
| <b>C18:1n-9</b>           | 34.05       | 0.14      |
| <b>C18:1n-7</b>           | 1.29        | 0.01      |
| <b>C18:2n-6</b>           | 29.31       | 0.21      |
| <b>C18:3n-3</b>           | 1.40        | 0.03      |
| <b>N-3 PUFA</b>           | 1.52        | 0.03      |
| <b>N-3 LCPUFA</b>         | 0.12        | 0.01      |
| <b>n-6 PUFA</b>           | 29.64       | 0.21      |
| <b>N-6 LCPUFA</b>         | 0.33        | 0.00      |
| <b>PUFA</b>               | 31.16       | 0.23      |
| <b>LCPUFA</b>             | 0.45        | 0.01      |
| <b>MUFA</b>               | 36.09       | 0.14      |
| <b>SAT</b>                | 27.32       | 0.18      |
| <b>Trans</b>              | 0.09        | 0.01      |
| <b>Branched sat</b>       | -           | -         |
| <b>Trans+Branched all</b> | 0.10        | 0.01      |
| <b>short SAT</b>          | 1.37        | 0.19      |

Mean (SD) values are based on 3 parallel chemical analysis.

**Supplementary Table S5:** Composition and energy content of the LT/R standard rodent food pellet by Innovo Ltd

|               |                                                                                                             |
|---------------|-------------------------------------------------------------------------------------------------------------|
| Ingredients   | maize, wheat, barley, sunflower meal, soya meal, milk powder, yeast, lime, feed meal, sunflower oil, premix |
| Dry matter    | 82.1 %                                                                                                      |
| Crude protein | 20.1 %                                                                                                      |
| Crude fat     | 3.9 %                                                                                                       |
| Crude fibre   | 4.5 %                                                                                                       |
| Crude ash     | 7.8 %                                                                                                       |
| Metab. energy | 11.9 MJ/kg                                                                                                  |

**Supplementary Table S6:** Retention times of determined fatty acids in the used external standards

| Retention time (min) | FAME      | GLC463 | GLC473b | GLC481 | GLC569b | GLC674 | GLC642 | GLC643 | C16:1n-9 | BAME CP MIX 1114 | Alles |
|----------------------|-----------|--------|---------|--------|---------|--------|--------|--------|----------|------------------|-------|
| 10.64                | C4:0      | *      |         |        | *       | *      |        |        |          |                  | *     |
| 11.51                | C5:0      | *      |         |        |         |        |        |        |          |                  |       |
| 12.69                | C6:0      | *      |         |        | *       | *      |        |        |          |                  | *     |
| 14.25                | C7:0      | *      |         |        |         |        |        |        |          |                  |       |
| 16.22                | C8:0      | *      |         |        | *       | *      |        |        |          |                  | *     |
| 18.51                | C9:0      | *      |         |        |         |        |        |        |          |                  |       |
| 21.04                | C10:0     | *      | *       |        | *       | *      |        |        |          |                  | *     |
| 23.65                | C11:0     | *      |         |        | *       | *      |        |        |          | *                | *     |
| 26.26                | C12:0     | *      | *       |        | *       | *      |        |        |          | *                | *     |
| 28.11                | C13ai     |        |         |        |         |        |        |        |          |                  | *     |
| 28.83                | C13:0     | *      |         |        | *       | *      |        |        |          | *                | *     |
| 30.05                | C14i      |        |         |        |         |        |        |        |          |                  | *     |
| 31.01                | C13:1n-1  | *      |         |        |         |        |        |        |          |                  |       |
| 31.30                | C14:0     | *      | *       |        | *       | *      |        |        |          | *                | *     |
| 32.49                | C15i      |        |         |        |         |        |        |        |          | *                |       |
| 32.96                | C15ai     |        |         |        |         |        |        |        |          | *                | *     |
| 33.27                | C14:1n-5  | *      | *       |        | *       | *      |        |        |          |                  | *     |
| 33.68                | C15:0     | *      |         |        | *       | *      |        |        |          | *                | *     |
| 34.81                | C16i      |        |         |        |         |        |        |        |          | *                | *     |
| 35.99                | C16:0     | *      | *       |        | *       | *      |        |        |          | *                | *     |
| 37.04                | tC16:1n-7 | *      | *       | *      | *       | *      |        |        |          |                  | *     |
| 37.04                | C17i      |        |         |        |         |        |        |        |          | *                |       |
| 37.31                | C16:1n-9  |        |         |        |         |        |        |        | *        |                  |       |
| 37.53                | C16:1n-7  | *      | *       |        | *       | *      |        |        |          |                  | *     |
| 38.13                | C17:0     | *      | *       |        | *       | *      |        |        |          | *                | *     |
| 39.17                | tC17:1n-7 |        |         | *      | *       | *      |        |        |          |                  | *     |
| 39.17                | C18i      |        |         |        |         |        |        |        |          |                  | *     |
| 40.24                | C18:0     | *      | *       |        | *       | *      |        |        |          | *                | *     |
| 41.08                | t18:1mix  | *      | *       | *      | *       | *      |        |        |          |                  | *     |
| 41.55                | C18:1n-9  | *      | *       |        | *       | *      |        |        |          |                  | *     |
| 41.72                | C18:1n-7  | *      | *       |        |         |        |        |        |          |                  | *     |
| 43.49                | C18:2n-6  | *      | *       |        | *       | *      |        | *      |          |                  | *     |
| 44.13                | C20:0     | *      | *       |        | *       | *      |        |        |          | *                | *     |
| 45.36                | C20:1n-9  | *      | *       |        | *       | *      |        |        |          |                  | *     |
| 45.63                | C18:3n-3  | *      | *       |        | *       | *      | *      |        |          |                  | *     |
| 47.17                | C20:2n-6  | *      | *       |        | *       | *      |        | *      |          |                  | *     |
| 47.75                | C22:0     | *      | *       |        | *       | *      |        |        |          |                  | *     |
| 48.51                | C20:3n-6  | *      | *       |        | *       | *      |        | *      |          |                  | *     |
| 48.93                | C22:1n-9  | *      | *       |        | *       | *      |        |        |          |                  | *     |

|       |          |   |   |  |   |   |   |   |  |  |   |
|-------|----------|---|---|--|---|---|---|---|--|--|---|
| 49.46 | C23:0    |   | * |  | * | * |   |   |  |  | * |
| 49.52 | C20:4n-6 | * | * |  | * | * |   | * |  |  | * |
| 51.13 | C24:0    | * | * |  | * | * |   |   |  |  | * |
| 51.67 | C20:5n-3 | * | * |  | * | * | * |   |  |  | * |
| 52.73 | C25:0    |   | * |  |   |   |   |   |  |  |   |
| 53.14 | C22:4n-6 | * | * |  | * | * |   | * |  |  | * |
| 53.92 | C22:5n-6 |   |   |  | * | * |   | * |  |  | * |
| 54.29 | C26:0    |   | * |  |   |   |   |   |  |  |   |

The asterisks denote which fatty acid was present in the given standards.



Logarithmic estimated marginal mean values of the summarized fatty acids concentration values in the wet stool

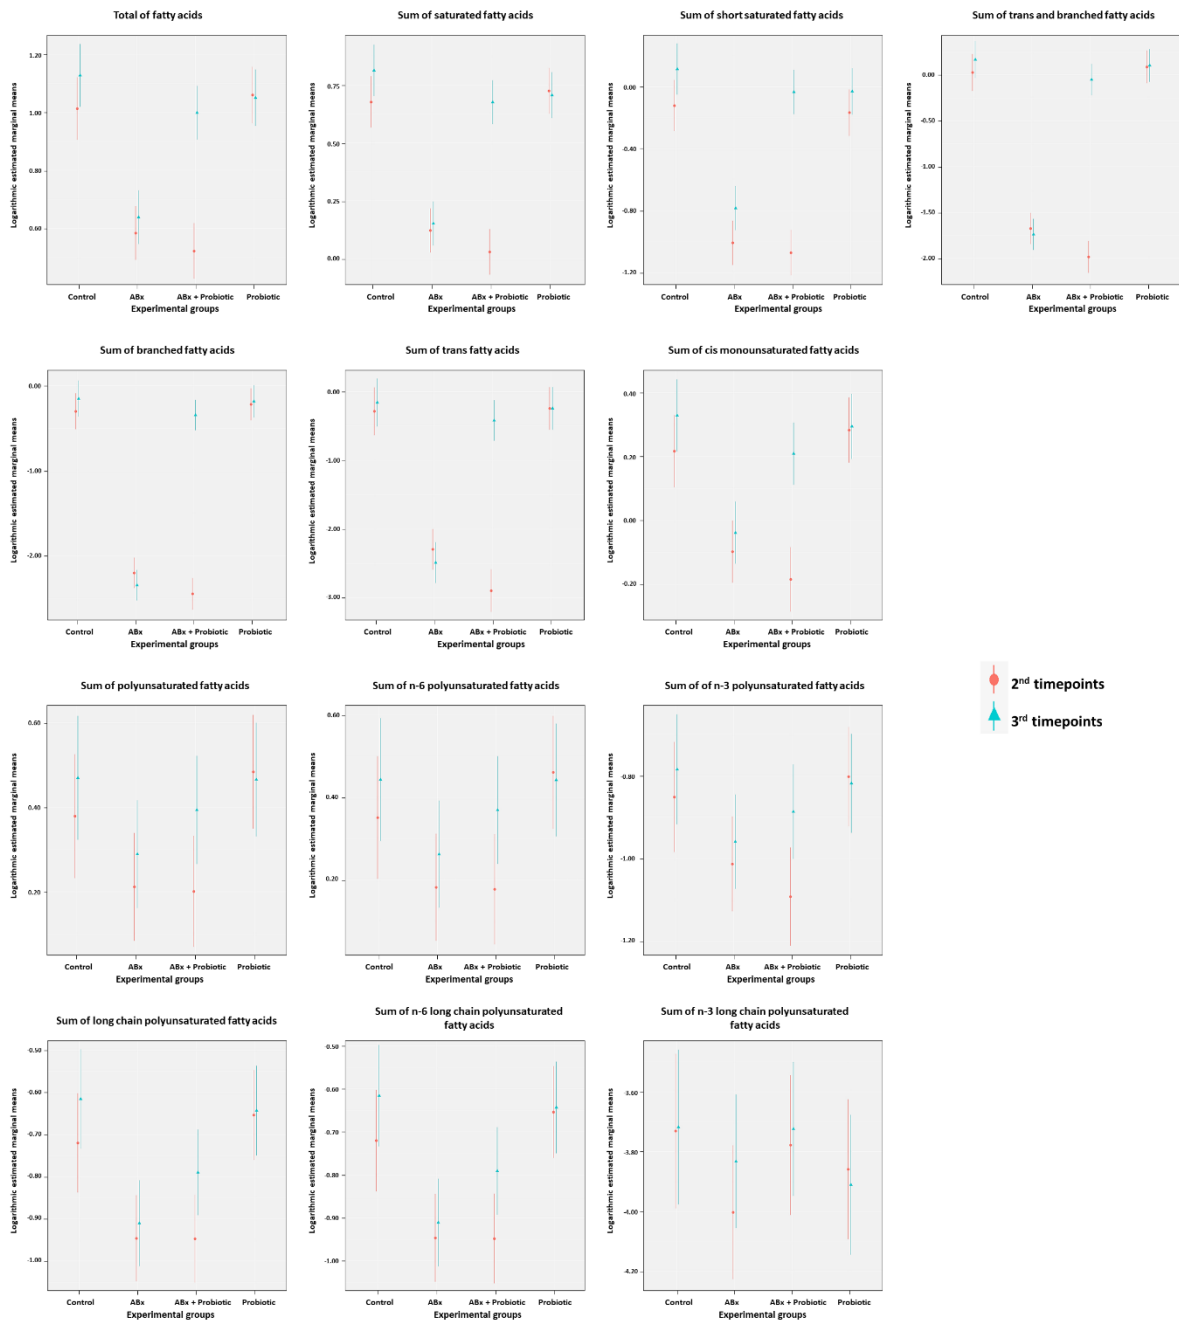

**Supplementary Figure S1:** Logarithmic estimated marginal mean values of the summarized fatty acid concentrations (in  $\mu\text{g}/100$  mg wet feces) at the 2<sup>nd</sup> and 3<sup>rd</sup> sampling times in the four treatment groups

Logarithmic estimated marginal mean values of the summarized fatty acids relative concentrations in the wet stool

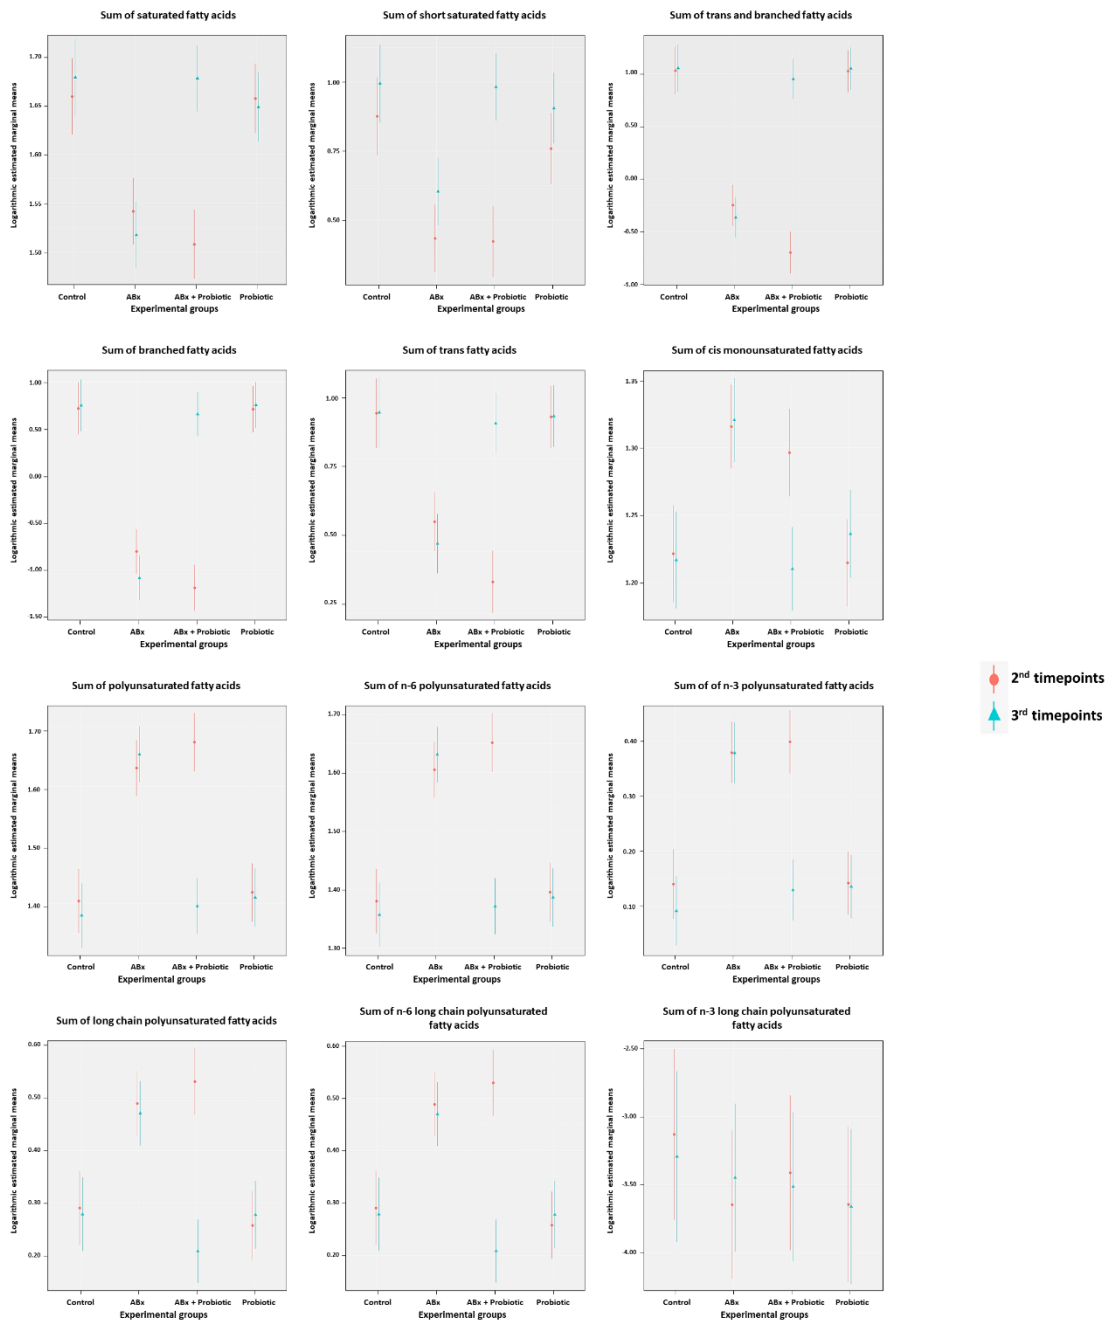

**Supplementary Figure S2:** Logarithmic estimated marginal mean values of the summarized fatty acid weight percent ratios at the 2<sup>nd</sup> and 3<sup>rd</sup> sampling times in the four treatment groups
